# Supplementary material for: Cancer cell metabolic plasticity allows resistance to NAMPT inhibition but invariably induces dependence on LDHA
Source: PubMed Central journal article supplement (PMC5844108; doi:10.1186/s40170-018-0174-7), 2018-03-08

# Additional Figure 2

**A**

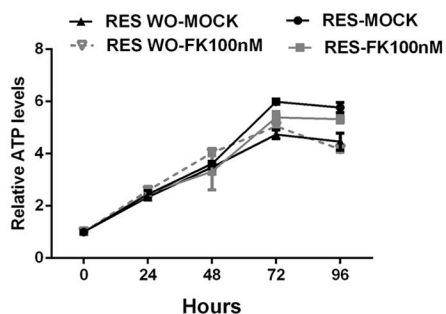

**B**

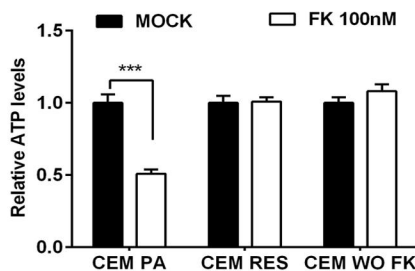

**C**

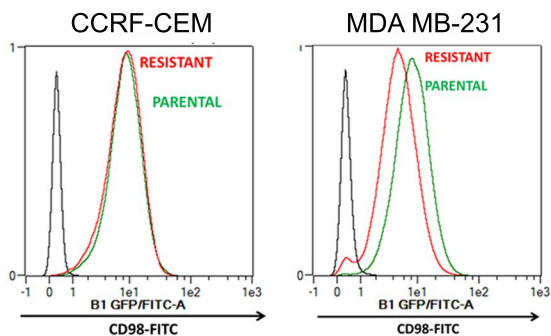

**D**

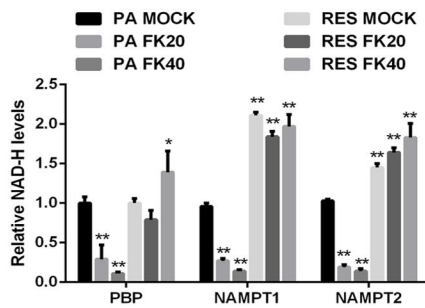

**E**

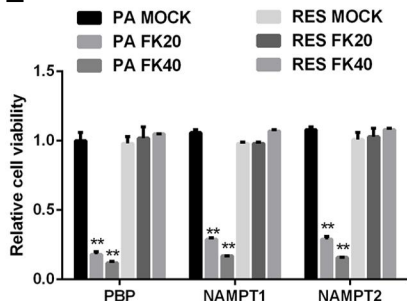

**F**

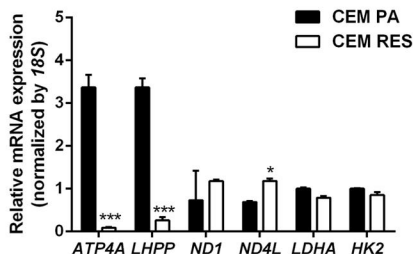

**G**

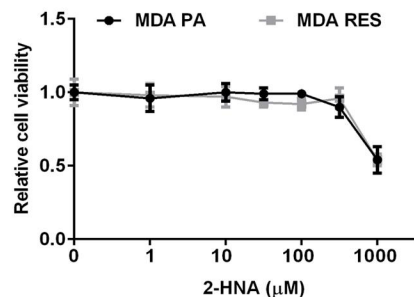

**H**

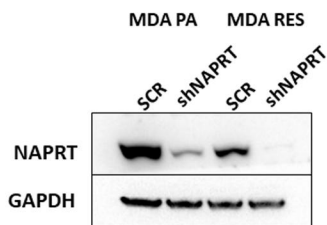

**I**

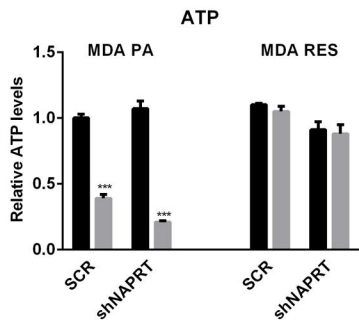

**J**

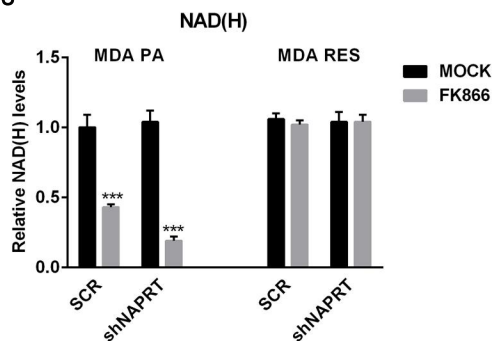

Supplement: 40170_2018_174_MOESM4_ESM.pdf [file 40170_2018_174_MOESM4_ESM.pdf]
